# Supplementary material for: Differential requirement of Srs2 helicase and Rad51 displacement activities in replication of hairpin-forming CAG/CTG repeats
Source: PubMed Central journal article supplement — Nucleic Acids Res. 2017 Feb 8;45(8):4519–31. doi: 10.1093/nar/gkx088 (PMC5416882; doi:10.1093/nar/gkx088), 2017-02-08
Supplement: gkx088_Supp.pdf [file gkx088_Supp.pdf]

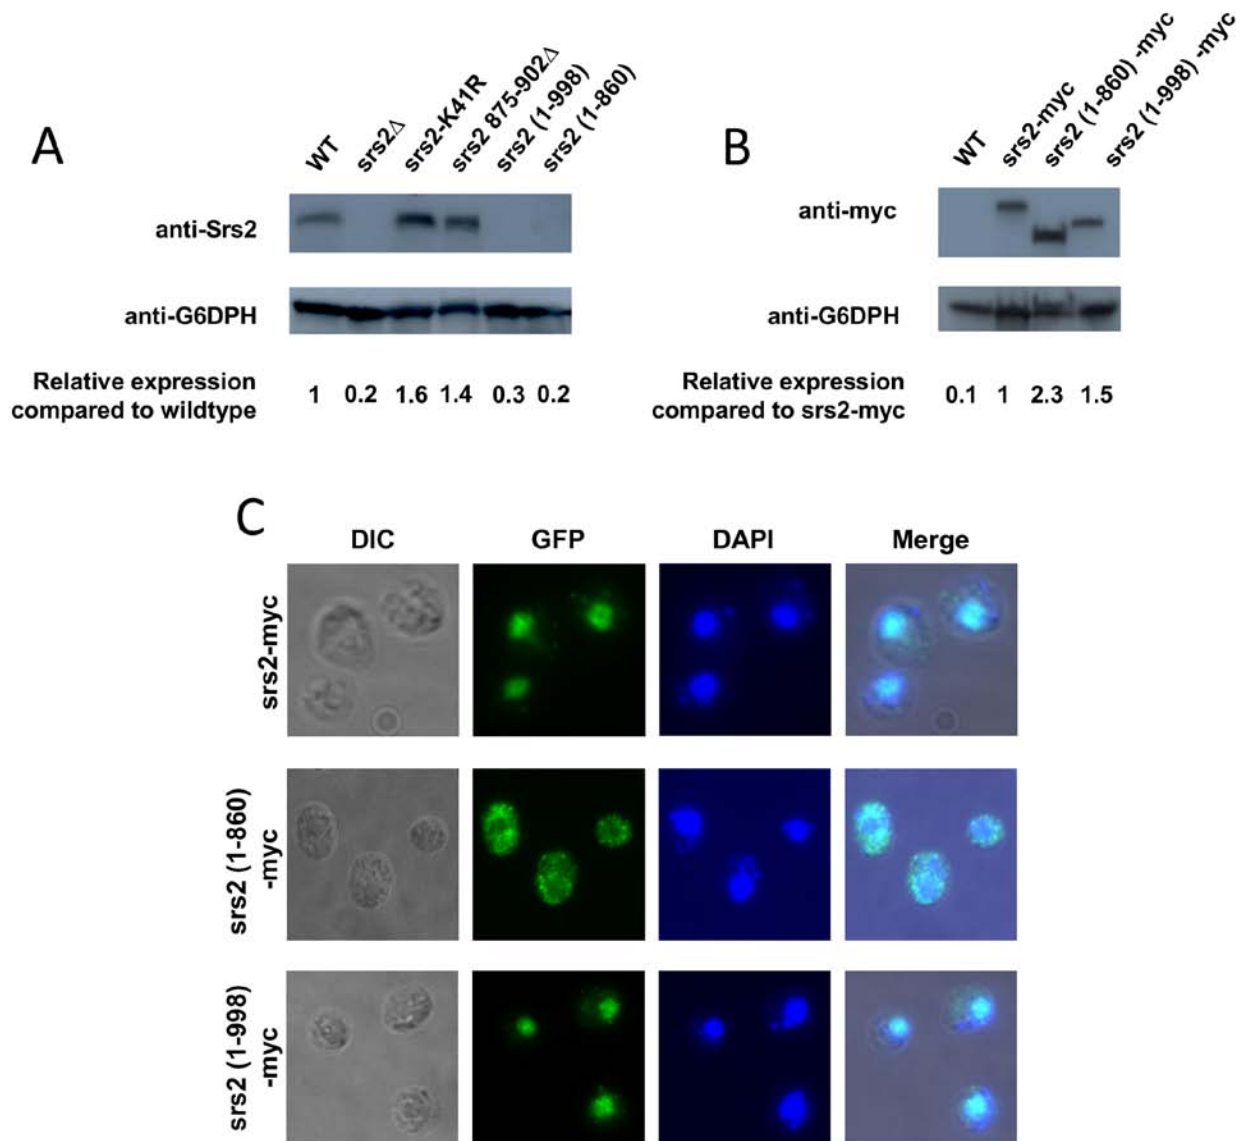

Figure S1. Expression of Srs2 domain mutant proteins. (A) Untagged proteins Srs2, *srs2*-K41R and *srs2* 875-902 $\Delta$  were detected using an antibody to the Srs2 C-terminus. (B) Srs2, *srs2* (1-860) and *srs2* (1-998) were C-terminally tagged with 13myc and detected using an anti-myc antibody. The relative expression level over either wild-type Srs2 or Srs2-myc after normalization to G6DPH is shown below the blots. (C) Protein localization was detected using a fluorescent anti-myc antibody to the myc tagged proteins. Examples are typical of 50-100 cells that were analyzed for each strain. Note that all proteins used in the experiments in the main manuscript were untagged, the tagged proteins were only used in the experiments shown here to detect protein levels and localization.

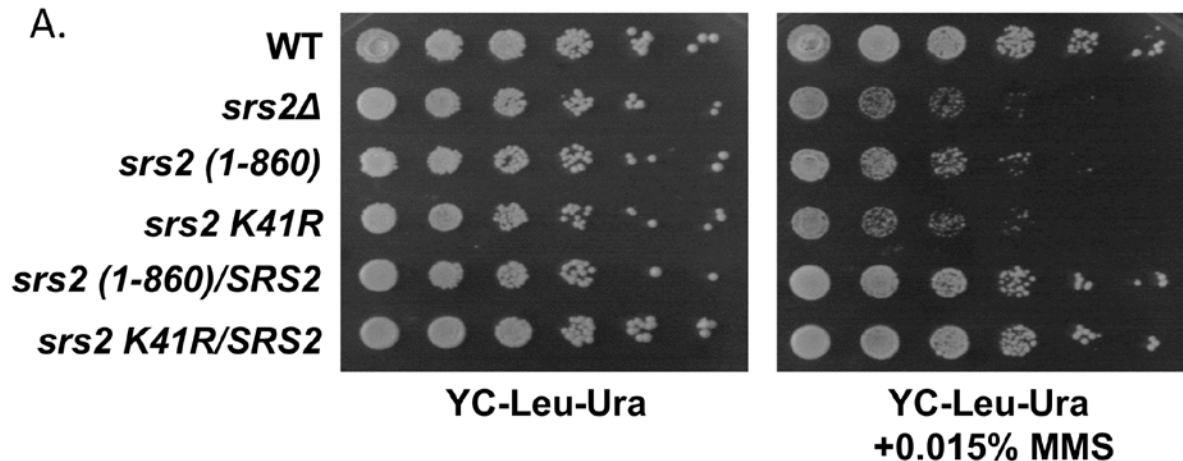

B. (CAG)<sub>70</sub> Instability on YAC in diploid strains

| Strain Name              | No. colonies analyzed | % Expansions | Fold over wild-type | % Contractions | Fold over wild-type |
|--------------------------|-----------------------|--------------|---------------------|----------------|---------------------|
| wild-type                | 269                   | 1.1          | 1.0                 | 2.6            | 1.0                 |
| <i>srs2Δ</i>             | 231                   | 5.6*         | 5.1*                | 6.5*           | 2.5*                |
| <i>srs2 (1-860)</i>      | 152                   | 5.3*         | 4.7*                | 12.5*          | 4.8*                |
| <i>srs2 (1-860)/SRS2</i> | 151                   | 3.3          | 2.3                 | 2.0            | 0.8                 |

\*p<0.05 compared to wild-type using Fisher's Exact Test

Figure S2. Comparison of MMS sensitivity and (CAG)<sub>70</sub> repeat instability in haploid and diploid strains. (A) Strains heterozygous for the indicated mutation or the corresponding haploid strains were serially diluted 1:5 and spotted onto plates either lacking or containing 0.015% MMS. (B) Instability of the CAG tract in the *srs2(1-860)/SRS2* diploid strain was analyzed as described in the main text, and compared to the corresponding haploid strains. Expansions, contractions, and MMS sensitivity were all suppressed by the presence of the wild-type SRS2 gene in the diploids.

### Supplemental Materials and Methods

#### Western blot analysis

Proteins were isolated as described in (1) with the following modifications: cells were resuspended in 100uL of 20% TCA prior to disruption and the resulting extract was neutralized with 50uL of 2M Tris Base. Equal volumes of extracts were loaded on 7.5% SDS page gels and semi-dry transferred to PVDF membrane; extracts from 40 OD<sub>600</sub> of cells were used for the anti-Srs2 blot, 5 OD<sub>600</sub> for the anti-myc blot. Membranes were blocked with 5% milk+PBST for 1 hour at room temperature before incubation with primary antibody in 1% milk+PBST overnight at 4°C followed by incubation with secondary antibody in 1% milk+PBST for 30 minutes at room temperature. The antibody that recognizes the Srs2 C-terminus (Santa Cruz, sc-11991) was used at 1:200 dilution. Srs2, *srs2 (1-860)* and *srs2 (1-998)* were not recognized by the sc-11991

antibody, and thus were C-terminally tagged with 13myc (2). The anti-myc antibody (Life Technologies, 13-2500) was used at 1:5000 dilution. The anti-G6DPH antibody (Sigma, A9521-1VL) was used at 1:10000 dilution. The secondary antibodies used were HRP-conjugated anti-goat (Santa Cruz, sc-2350) used at 1:5000 dilution, HRP-conjugated anti-mouse (Invitrogen, 626520) used at 1:5000 dilution, and HRP-conjugated anti-rabbit (Invitrogen, A24537) used at 1:10000 dilution. Enhanced chemiluminescence (ECL) Western blot substrate (Thermo Scientific, 32106) and Sharp autoradiography film (Denville, E3018) were used to detect protein signal. Quantification was performed in ImageJ. Two replicates were performed.

### Immunofluorescence

Early log phase cells grown in YC –Leu-Ura were fixed with 3.7% formaldehyde. Cells were spheroplasted with 50µg/ml Zymolyase (100T) in 0.1M potassium phosphate pH 7.5 at 30°C. Spheroplasts were blocked with PBST+3% BSA at room temperature for 30 minutes before incubation with primary antibody in PBST+3% BSA at 4°C overnight followed by incubation with secondary antibody at room temperature in PBST+3% BSA for 45 minutes in the dark. 15 minutes prior to the end of the secondary antibody incubation, Hoechst dye (ThermoFisher, H1398) was added to a final concentration of 2µg/ml. The anti-myc antibody was the same as above used at 1:500 dilution. The secondary antibody was an Alexa Fluor 488 conjugated goat anti-mouse antibody (ThermoFisher, A11001) used at 1:500 dilution. Images were acquired using a Zeiss microscope equipped with a Plan-Apochromat 100X 1.4 DIC oil immersion objective and Axiocam 503 mono camera. Exposure times were 50ms (DIC), 500ms (GFP), and 7000ms (DAPI). Images were processed using ZEN pro.

### MMS Sensitivity Assay

Spot assays were performed as previously described in (3) with 0.015% MMS. This data is for strains containing a CAG-70 YAC; results for strains containing a no tract or CTG-70 YAC were similar. Assays were performed with at least two replicates for each tract length.

1. Foiani, M., Marini, F., Gamba, D., Lucchini, G. and Plevani, P. (1994) The B subunit of the DNA polymerase alpha-primase complex in *Saccharomyces cerevisiae* executes an essential function at the initial stage of DNA replication. *Mol. Cell. Biol.*, **14**, 923–33.
2. Longtine, M.S., McKenzie, A., Demarini, D.J., Shah, N.G., Wach, A., Brachat, A., Philippsen, P. and Pringle, J.R. (1998) Additional modules for versatile and economical PCR-based gene deletion and modification in *Saccharomyces cerevisiae*. *Yeast*, **14**, 953–961.
3. Frizzell, A., Nguyen, J.H.G., Petalcorin, M.I.R., Turner, K.D., Boulton, S.J., Freudenreich, C.H. and Lahue, R.S. (2014) RTEL1 inhibits trinucleotide repeat expansions and fragility. *Cell Rep.*, **6**, 827–835.

**Table S1. Strains used in this study**

| Strain             | Background | Genotype                                                                                                                                                                                                                                                                                                                                                                                              | Reference           |
|--------------------|------------|-------------------------------------------------------------------------------------------------------------------------------------------------------------------------------------------------------------------------------------------------------------------------------------------------------------------------------------------------------------------------------------------------------|---------------------|
| CFY765             | BY4705     | <i>MAT<math>\alpha</math></i> , <i>ade2<math>\Delta</math>::hisG</i> , <i>his3<math>\Delta</math>200</i> , <i>leu2<math>\Delta</math>0</i> , <i>lys2<math>\Delta</math>0</i> , <i>met15<math>\Delta</math>0</i> , <i>trp1<math>\Delta</math>63</i> , <i>ura3<math>\Delta</math>0</i> , <i>can<sup>R</sup></i><br>YAC: <i>LEU2</i> No Tract <i>URA3</i>                                                | Kerrest et al. 2009 |
| CFY766             | BY4705     | <i>MAT<math>\alpha</math></i> , <i>ade2<math>\Delta</math>::hisG</i> , <i>his3<math>\Delta</math>200</i> , <i>leu2<math>\Delta</math>0</i> , <i>lys2<math>\Delta</math>0</i> , <i>met15<math>\Delta</math>0</i> , <i>trp1<math>\Delta</math>63</i> , <i>ura3<math>\Delta</math>0</i> , <i>can<sup>R</sup></i><br>YAC: <i>LEU2</i> CAG-70 <i>URA3</i>                                                  | Kerrest et al. 2009 |
| CFY1626            | BY4705     | <i>MAT<math>\alpha</math></i> , <i>ade2<math>\Delta</math>::hisG</i> , <i>his3<math>\Delta</math>200</i> , <i>leu2<math>\Delta</math>0</i> , <i>lys2<math>\Delta</math>0</i> , <i>met15<math>\Delta</math>0</i> , <i>trp1<math>\Delta</math>63</i> , <i>ura3<math>\Delta</math>0</i> , <i>can<sup>R</sup></i><br>YAC: <i>LEU2</i> No Tract <i>URA3</i>                                                | This study          |
| CFY1628            | BY4705     | <i>MAT<math>\alpha</math></i> , <i>ade2<math>\Delta</math>::hisG</i> , <i>his3<math>\Delta</math>200</i> , <i>leu2<math>\Delta</math>0</i> , <i>lys2<math>\Delta</math>0</i> , <i>met15<math>\Delta</math>0</i> , <i>trp1<math>\Delta</math>63</i> , <i>ura3<math>\Delta</math>0</i> , <i>can<sup>R</sup></i><br>YAC: <i>LEU2</i> CAG-70 <i>URA3</i>                                                  | This study          |
| CFY925<br>CFY926   | BY4742     | <i>MAT<math>\alpha</math></i> , <i>his3<math>\Delta</math>1</i> , <i>leu2<math>\Delta</math>0</i> , <i>lys2<math>\Delta</math>0</i> , <i>ura3<math>\Delta</math>0</i> , <i>can<sup>R</sup></i> , <i>srs2<math>\Delta</math>::KANMX6</i><br>YAC: <i>LEU2</i> No Tract <i>URA3</i>                                                                                                                      | Kerrest et al. 2009 |
| CFY927<br>CFY928   | BY4742     | <i>MAT<math>\alpha</math></i> , <i>his3<math>\Delta</math>1</i> , <i>leu2<math>\Delta</math>0</i> , <i>lys2<math>\Delta</math>0</i> , <i>ura3<math>\Delta</math>0</i> , <i>can<sup>R</sup></i> , <i>srs2<math>\Delta</math>::KANMX6</i><br>YAC: <i>LEU2</i> CAG-70 <i>URA3</i>                                                                                                                        | Kerrest et al. 2009 |
| CFY2623            | BY4705     | <i>MAT<math>\alpha</math></i> , <i>ade2<math>\Delta</math>::hisG</i> , <i>his3<math>\Delta</math>200</i> , <i>leu2<math>\Delta</math>0</i> , <i>lys2<math>\Delta</math>0</i> , <i>met15<math>\Delta</math>0</i> , <i>trp1<math>\Delta</math>63</i> , <i>ura3<math>\Delta</math>0</i> , <i>can<sup>R</sup></i> , <i>srs2<math>\Delta</math>::TRP1</i><br>YAC: <i>LEU2</i> CAG-70 <i>URA3</i>           | This study          |
| CFY1701            | BY4705     | <i>MAT<math>\alpha</math></i> , <i>his3<math>\Delta</math>1</i> , <i>leu2<math>\Delta</math>0</i> , <i>lys2<math>\Delta</math>0</i> , <i>ura3<math>\Delta</math>0</i> , <i>can<sup>R</sup></i><br>YAC: <i>LEU2</i> CTG-70 <i>URA3</i>                                                                                                                                                                 | Kerrest et al. 2009 |
| CFY1712            | BY4705     | <i>MAT<math>\alpha</math></i> , <i>his3<math>\Delta</math>1</i> , <i>leu2<math>\Delta</math>0</i> , <i>lys2<math>\Delta</math>0</i> , <i>ura3<math>\Delta</math>0</i> , <i>can<sup>R</sup></i> , <i>srs2<math>\Delta</math>::KANMX6</i><br>YAC: <i>LEU2</i> CTG-70 <i>URA3</i>                                                                                                                        | Kerrest et al. 2009 |
| CFY2497<br>CFY2498 | BY4705     | <i>MAT<math>\alpha</math></i> , <i>ade2<math>\Delta</math>::hisG</i> , <i>his3<math>\Delta</math>200</i> , <i>leu2<math>\Delta</math>0</i> , <i>lys2<math>\Delta</math>0</i> , <i>met15<math>\Delta</math>0</i> , <i>trp1<math>\Delta</math>63</i> , <i>ura3<math>\Delta</math>0</i> , <i>can<sup>R</sup></i> , <i>srs2-(1-860)-HYG</i><br>YAC: <i>LEU2</i> No Tract <i>URA3</i>                      | This study          |
| CFY2087<br>CFY2088 | BY4705     | <i>MAT<math>\alpha</math></i> , <i>ade2<math>\Delta</math>::hisG</i> , <i>his3<math>\Delta</math>200</i> , <i>leu2<math>\Delta</math>0</i> , <i>lys2<math>\Delta</math>0</i> , <i>met15<math>\Delta</math>0</i> , <i>trp1<math>\Delta</math>63</i> , <i>ura3<math>\Delta</math>0</i> , <i>can<sup>R</sup></i> , <i>srs2-(1-860)-HYG</i><br>YAC: <i>LEU2</i> CAG-70 <i>URA3</i>                        | This study          |
| CFY2499<br>CFY2500 | BY4705     | <i>MAT<math>\alpha</math></i> , <i>his3<math>\Delta</math>1</i> , <i>leu2<math>\Delta</math>0</i> , <i>lys2<math>\Delta</math>0</i> , <i>ura3<math>\Delta</math>0</i> , <i>srs2-(1-860)-HYG</i><br>YAC: <i>LEU2</i> CTG-70 <i>URA3</i>                                                                                                                                                                | This study          |
| CFY2501            | BY4705     | <i>MAT<math>\alpha</math></i> , <i>ade2<math>\Delta</math>::hisG</i> , <i>his3<math>\Delta</math>200</i> , <i>leu2<math>\Delta</math>0</i> , <i>lys2<math>\Delta</math>0</i> , <i>met15<math>\Delta</math>0</i> , <i>trp1<math>\Delta</math>63</i> , <i>ura3<math>\Delta</math>0</i> , <i>can<sup>R</sup></i> , <i>srs2-(875-902<math>\Delta</math>)-HYG</i><br>YAC: <i>LEU2</i> No Tract <i>URA3</i> | This study          |
| CFY2135<br>CFY2136 | BY4705     | <i>MAT<math>\alpha</math></i> , <i>ade2<math>\Delta</math>::hisG</i> , <i>his3<math>\Delta</math>200</i> , <i>leu2<math>\Delta</math>0</i> , <i>lys2<math>\Delta</math>0</i> , <i>met15<math>\Delta</math>0</i> , <i>trp1<math>\Delta</math>63</i> , <i>ura3<math>\Delta</math>0</i> , <i>can<sup>R</sup></i> , <i>srs2-(875-902<math>\Delta</math>)-HYG</i><br>YAC: <i>LEU2</i> CAG-70 <i>URA3</i>   | This study          |
| CFY2503<br>CFY2504 | BY4705     | <i>MAT<math>\alpha</math></i> , <i>his3<math>\Delta</math>1</i> , <i>leu2<math>\Delta</math>0</i> , <i>lys2<math>\Delta</math>0</i> , <i>ura3<math>\Delta</math>0</i> , <i>can<sup>R</sup></i> , <i>srs2-(875-902<math>\Delta</math>)-HYG</i><br>YAC: <i>LEU2</i> CTG-70 <i>URA3</i>                                                                                                                  | This study          |
| CFY2505            | BY4705     | <i>MAT<math>\alpha</math></i> , <i>ade2<math>\Delta</math>::hisG</i> , <i>his3<math>\Delta</math>200</i> , <i>leu2<math>\Delta</math>0</i> , <i>lys2<math>\Delta</math>0</i> ,                                                                                                                                                                                                                        | This study          |

|                               |        |                                                                                                                                                                         |                      |
|-------------------------------|--------|-------------------------------------------------------------------------------------------------------------------------------------------------------------------------|----------------------|
| CFY2506                       |        | <i>met15Δ0, trp1Δ63, ura3Δ0, can<sup>R</sup>, srs2-K41R-HIS3MX6</i><br>YAC: <i>LEU2 No Tract URA3</i>                                                                   |                      |
| CFY2305<br>CFY2306<br>CFY2307 | BY4705 | <i>MATα, ade2Δ::hisG, his3Δ200, leu2Δ0, lys2Δ0, met15Δ0, trp1Δ63, ura3Δ0, can<sup>R</sup>, srs2-K41R-HIS3MX6</i><br>YAC: <i>LEU2 CAG-70 URA3</i>                        | This study           |
| CFY2507<br>CFY2508            | BY4705 | <i>MATα, his3Δ1, leu2Δ0, lys2Δ0, ura3Δ0, can<sup>R</sup>, srs2-K41R-HIS3MX6</i><br>YAC: <i>LEU2 CTG-70 URA3</i>                                                         | This study           |
| CFY2509<br>CFY2510            | BY4705 | <i>MATα, ade2Δ::hisG, his3Δ200, leu2Δ0, lys2Δ0, met15Δ0, trp1Δ63, ura3Δ0, can<sup>R</sup>, srs2-(1-998)-HIS3MX6</i><br>YAC: <i>LEU2 No Tract URA3</i>                   | This study           |
| CFY2299<br>CFY2300            | BY4705 | <i>MATα, ade2Δ::hisG, his3Δ200, leu2Δ0, lys2Δ0, met15Δ0, trp1Δ63, ura3Δ0, can<sup>R</sup>, srs2-(1-998)-HIS3MX6</i><br>YAC: <i>LEU2 CAG-70 URA3</i>                     | This study           |
| CFY2511<br>CFY2512            | BY4705 | <i>MATα, his3Δ1, leu2Δ0, lys2Δ0, ura3Δ0, can<sup>R</sup>, srs2-(1-998)-HIS3MX6</i><br>YAC: <i>LEU2 CTG-70 URA3</i>                                                      | This study           |
| CFY3025                       | BY4705 | <i>MATα, ade2Δ::hisG, his3Δ200, leu2Δ0, lys2Δ0, met15Δ0, trp1Δ63, ura3Δ0, can<sup>R</sup>, srs2-K41R-HIS3MX6 rad51::KANMX6</i><br>YAC: <i>LEU2 CAG-70 URA3</i>          | This study           |
| CFY841                        | BY4742 | <i>MATα, his3Δ1, leu2Δ0, lys2Δ0, ura3Δ0, can<sup>R</sup> rad51::KANMX6</i><br>YAC: <i>LEU2 CAG-70 URA3</i>                                                              | Kerrest et al., 2009 |
| CFY2356                       | BY4705 | <i>MATα, ade2Δ::hisG, his3Δ200, leu2Δ0, lys2Δ0, met15Δ0, trp1Δ63, ura3Δ0, can<sup>R</sup> srs2::srs2-K1081R K1089R K1142R::KANMX6</i><br>YAC: <i>LEU2 No Tract URA3</i> | Su et al., 2015      |
| CFY2472<br>CFY2473            | BY4705 | <i>MATα, ade2Δ::hisG, his3Δ200, leu2Δ0, lys2Δ0, met15Δ0, trp1Δ63, ura3Δ0, can<sup>R</sup> srs2::srs2-K1081R K1089R K1142R::KANMX6</i><br>YAC: <i>LEU2 CAG-70 URA3</i>   | Su et al., 2015      |
| CFY4051                       | BY4705 | <i>MATα/a, ade2Δ::hisG, his3Δ200, leu2Δ0, lys2Δ0, met15Δ0, trp1Δ63, ura3Δ0, can<sup>R</sup> srs2-(1-860)-HYG/SRS2</i><br>YAC: <i>LEU2 No Tract URA3</i>                 | This study           |
| CFY4052                       | BY4705 | <i>MATα/a, ade2Δ::hisG, his3Δ200, leu2Δ0, lys2Δ0, met15Δ0, trp1Δ63, ura3Δ0, can<sup>R</sup> srs2-(1-860)-HYG/SRS2</i><br>YAC: <i>LEU2 CAG-70 URA3</i>                   | This study           |
| CFY4053                       | BY4705 | <i>MATα/a, ade2Δ::hisG, his3Δ200, leu2Δ0, lys2Δ0, met15Δ0, trp1Δ63, ura3Δ0, can<sup>R</sup> srs2-(1-860)-HYG/SRS2</i><br>YAC: <i>LEU2 CTG-70 URA3</i>                   | This study           |
| CFY4054                       | BY4705 | <i>MATα/a, ade2Δ::hisG, his3Δ200, leu2Δ0, lys2Δ0, met15Δ0, trp1Δ63, ura3Δ0, can<sup>R</sup> srs2-K41R-</i>                                                              | This study           |

|                    |        |                                                                                                                                                          |                      |
|--------------------|--------|----------------------------------------------------------------------------------------------------------------------------------------------------------|----------------------|
|                    |        | <i>HIS3MX6 /SRS2</i><br>YAC: <i>LEU2</i> No Tract <i>URA3</i>                                                                                            |                      |
| CFY4055            | BY4705 | <i>MATa/a, ade2Δ::hisG, his3Δ200, leu2Δ0, lys2Δ0, met15Δ0, trp1Δ63, ura3Δ0, can<sup>R</sup> srs2-K41R-HIS3MX6 /SRS2</i><br>YAC: <i>LEU2 CAG-70 URA3</i>  | This study           |
| CFY4056            | BY4705 | <i>MATa/a, ade2Δ::hisG, his3Δ200, leu2Δ0, lys2Δ0, met15Δ0, trp1Δ63, ura3Δ0, can<sup>R</sup> srs2-K41R-HIS3MX6 /SRS2</i><br>YAC: <i>LEU2 CTG-70 URA3</i>  | This study           |
| CFY2600<br>CFY2601 | BY4705 | <i>MATα, ade2Δ::hisG, his3Δ200, leu2Δ0, lys2Δ0, met15Δ0, trp1Δ63, ura3Δ0, can<sup>R</sup>, mph1Δ::KANMX6</i><br>YAC: <i>LEU2</i> No Tract <i>URA3</i>    | This study           |
| CFY2602<br>CFY2603 | BY4705 | <i>MATα, ade2Δ::hisG, his3Δ200, leu2Δ0, lys2Δ0, met15Δ0, trp1Δ63, ura3Δ0, can<sup>R</sup>, mph1Δ::KANMX6</i><br>YAC: <i>LEU2 CAG-70 URA3</i>             | This study           |
| CFY1664<br>CFY1665 | BY4705 | <i>MATα, ade2Δ::hisG, his3Δ200, leu2Δ0, lys2Δ0, met15Δ0, trp1Δ63, ura3Δ0, can<sup>R</sup>, rad5Δ::KANMX6</i><br>YAC: <i>LEU2</i> No Tract <i>URA3</i>    | This study           |
| CFY1666            | BY4705 | <i>MATα, ade2Δ::hisG, his3Δ200, leu2Δ0, lys2Δ0, met15Δ0, trp1Δ63, ura3Δ0, can<sup>R</sup>, rad5Δ::KANMX6</i><br>YAC: <i>LEU2 CAG-70 URA3</i>             | This study           |
| CFY4104            | BY4705 | <i>MATa, ade2Δ::hisG, his3Δ200, leu2Δ0, lys2Δ0, met15Δ0, trp1Δ63, ura3Δ0, can<sup>R</sup> Srs2-13myc-KANMX6</i><br>YAC: <i>LEU2 CAG-70 URA3</i>          | This study           |
| CFY4105            | BY4705 | <i>MATα, ade2Δ::hisG, his3Δ200, leu2Δ0, lys2Δ0, met15Δ0, trp1Δ63, ura3Δ0, can<sup>R</sup>, srs2-(1-860)-13myc-KANMX6</i><br>YAC: <i>LEU2 CAG-70 URA3</i> | This study           |
| CFY4161            | BY4705 | <i>MATα, ade2Δ::hisG, his3Δ200, leu2Δ0, lys2Δ0, met15Δ0, trp1Δ63, ura3Δ0, can<sup>R</sup>, srs2-(1-998)-13myc-KANMX6</i><br>YAC: <i>LEU2 CAG-70 URA3</i> | This study           |
| GFY117             | S288C  | <i>MATa ura3Δ851 leu2Δ1 his3Δ200 trp1Δ63 ade2-opal SUP4 arg2Δ::CTG98-TRP1</i>                                                                            | Kerrest et al., 2009 |
| CFY3910            | S288C  | <i>MATa ura3Δ851 leu2Δ1 his3Δ200 trp1Δ63 ade2-opal SUP4 arg2Δ::CTG98-TRP1 srs2Δ::KANMX6</i>                                                              | This study           |
| GFY177             | S288C  | <i>MATa ura3Δ851 leu2Δ1 his3Δ200 trp1Δ63 ade2-opal SUP4 arg2Δ::CTG98-TRP1 srs2-(875-902Δ)-HYG</i>                                                        | This study           |
| GFY195             | S288C  | <i>MATa ura3Δ851 leu2Δ1 his3Δ200 trp1Δ63 ade2-opal SUP4 arg2Δ::CTG98-TRP1 rad5Δ::KANMX4</i>                                                              | This study           |
| GFY196             | S288C  | <i>MATa ura3Δ851 leu2Δ1 his3Δ200 trp1Δ63 ade2-opal SUP4 arg2Δ::CTG98-TRP1 mph1Δ::KANMX4</i>                                                              | This study           |
| GFY197             | S288C  | <i>MATa ura3Δ851 leu2Δ1 his3Δ200 trp1Δ63 ade2-opal SUP4 arg2Δ::CTG98-TRP1 srs2-K41R-HIS3MX6 rad51Δ::KANMX6</i>                                           | This study           |
| GFY198             | S288C  | <i>MATa ura3Δ851 leu2Δ1 his3Δ200 trp1Δ63 ade2-opal SUP4 arg2Δ::CTG98-TRP1 srs2-(875-902Δ)-</i>                                                           | This study           |

|         |       |                                                                                                    |            |
|---------|-------|----------------------------------------------------------------------------------------------------|------------|
|         |       | <i>HYG rad51Δ::KANMX6</i>                                                                          |            |
| CFY2201 | S288C | <i>MATa ura3Δ851 leu2Δ1 his3Δ200 trp1Δ63 ade2-opal SUP4 arg2Δ::CTG98-TRP1 srs2-(1-860)-HYG</i>     | This study |
| CFY2301 | S288C | <i>MATa ura3Δ851 leu2Δ1 his3Δ200 trp1Δ63 ade2-opal SUP4 arg2Δ::CTG98-TRP1 srs2-(1-998)-HIS3MX6</i> | This study |
| CFY2303 | S288C | <i>MATa ura3Δ851 leu2Δ1 his3Δ200 trp1Δ63 ade2-opal SUP4 arg2Δ::CTG98-TRP1 srs2-K41R-HIS3MX6</i>    | This study |
| CFY3078 | S288C | <i>MATa ura3Δ851 leu2Δ1 his3Δ200 trp1Δ63 ade2-opal SUP4 arg2Δ::CTG98-TRP1 exo1Δ::KANMX6</i>        | This study |

**Table S2. Instability Data: (CAG)<sub>70</sub> amplified from strains containing YAC CF1**

| Strain                    | No. colonies analyzed | Expansion (#) | Expansion (%) | p-value compared to wild-type | p-value compared to <i>srs2Δ</i> |
|---------------------------|-----------------------|---------------|---------------|-------------------------------|----------------------------------|
| wild-type                 | 269                   | 3             | 1.1           |                               |                                  |
| <i>srs2Δ</i>              | 231                   | 13            | 5.6           | 0.0047                        |                                  |
| <i>rad51Δ</i>             | 184                   | 9             | 4.9           | 0.0176                        | 0.8275                           |
| <i>srs2-(1-860)</i>       | 152                   | 8             | 5.3           | 0.0207                        | 1                                |
| <i>srs2-(875-902Δ)</i>    | 162                   | 7             | 4.3           | 0.0456                        | 0.6458                           |
| <i>srs2-K41R</i>          | 201                   | 10            | 5.0           | 0.0194                        | 0.8321                           |
| <i>srs2-(1-998)</i>       | 122                   | 2             | 1.6           | 0.6493                        | 0.0977                           |
| <i>srs2-3KR</i>           | 157                   | 3             | 1.9           | 0.6739                        | 0.1158                           |
| <i>srs2-K41R rad51Δ</i>   | 174                   | 2             | 1.5           | 1                             | 0.0178                           |
| <i>mph1Δ</i>              | 290                   | 8             | 2.8           | 0.2256                        | 0.1179                           |
| <i>rad5Δ</i>              | 190                   | 4             | 2.1           | 0.4453                        | 0.0829                           |
| <i>srs2 (1-860) /SRS2</i> | 151                   | 5             | 3.3           | 0.1425                        | 0.3349                           |

| Strain | No. colonies analyzed | Contraction (#) | Contraction (%) | p-value compared to wild-type | p-value compared to <i>srs2Δ</i> |
|--------|-----------------------|-----------------|-----------------|-------------------------------|----------------------------------|
|--------|-----------------------|-----------------|-----------------|-------------------------------|----------------------------------|

|                                     |     |    |      |        |        |
|-------------------------------------|-----|----|------|--------|--------|
| wild-type                           | 269 | 7  | 2.6  |        |        |
| <i>srs2</i> Δ                       | 231 | 15 | 6.5  | 0.0474 |        |
| <i>rad51</i> Δ                      | 184 | 25 | 13.6 | 0.0001 | 0.0186 |
| <i>srs2</i> -(1-860)                | 152 | 19 | 12.5 | 0.0001 | 0.0649 |
| <i>srs2</i> -(875-902Δ)             | 162 | 16 | 9.9  | 0.0016 | 0.2555 |
| <i>srs2</i> -K41R                   | 201 | 19 | 9.5  | 0.0018 | 0.2852 |
| <i>srs2</i> -(1-998)                | 122 | 4  | 3.3  | 0.7454 | 0.3206 |
| <i>srs2</i> -3KR                    | 157 | 8  | 5.1  | 0.185  | 0.8265 |
| <i>srs2</i> -K41R<br><i>rad51</i> Δ | 173 | 3  | 1.7  | 0.7466 | 0.0474 |
| <i>mph1</i> Δ                       | 290 | 15 | 5.2  | 0.1322 | 0.5726 |
| <i>rad5</i> Δ                       | 190 | 9  | 4.7  | 0.3015 | 0.5287 |
| <i>srs2</i> (1-860)<br>/SRS2        | 151 | 3  | 2.0  | 1      | 0.0487 |



**Table S3. Fragility Data: Rate of FOA<sup>R</sup> in strains containing YAC CF1**

| Strain                  | Repeat Length | # of Assays | Mean FOA <sup>R</sup> x 10 <sup>-6</sup> | SEM  | p-value compared to wild-type | p-value compared to <i>srs2</i> Δ |
|-------------------------|---------------|-------------|------------------------------------------|------|-------------------------------|-----------------------------------|
| wild-type               | No Tract      | 7           | 2.2                                      | 0.20 |                               |                                   |
| <i>srs2</i> Δ           | No Tract      | 9           | 2.2                                      | 0.31 | 0.9639                        |                                   |
| <i>srs2</i> -(1-860)    | No Tract      | 5           | 1.9                                      | 0.28 | 0.4528                        | 0.5639                            |
| <i>srs2</i> -(875-902Δ) | No Tract      | 5           | 1.8                                      | 0.32 | 0.2877                        | 0.4013                            |
| <i>srs2</i> -K41R       | No Tract      | 4           | 1.8                                      | 0.35 | 0.3467                        | 0.4765                            |
| <i>srs2</i> -(1-998)    | No Tract      | 3           | 3.4                                      | 0.23 | 0.0076                        | 0.0611                            |
| <i>srs2</i> -3KR        | No Tract      | 3           | 2.6                                      | 0.85 | 0.4844                        | 0.5656                            |
| <i>mph1</i> Δ           | No Tract      | 4           | 2.1                                      | 0.29 | 0.7640                        | 0.8126                            |
| <i>rad5</i> Δ           | No Tract      | 3           | 3.5                                      | 0.74 | 0.0396                        | 0.0794                            |
| wild-type               | CAG-70        | 9           | 9.4                                      | 1.2  |                               |                                   |
| <i>srs2</i> Δ           | CAG-70        | 16          | 30                                       | 3.2  | 0.0001                        |                                   |
| <i>srs2</i> -(1-860)    | CAG-70        | 4           | 39                                       | 5.9  | <0.0001                       | 0.2355                            |
| <i>srs2</i> -(875-902Δ) | CAG-70        | 5           | 12                                       | 1.8  | 0.3248                        | 0.0062                            |
| <i>srs2</i> -K41R       | CAG-70        | 3           | 22                                       | 1.2  | 0.0003                        | 0.3071                            |
| <i>srs2</i> -(1-998)    | CAG-70        | 3           | 26                                       | 1.6  | <0.0001                       | 0.6097                            |
| <i>srs2</i> -3KR        | CAG-70        | 3           | 4.8                                      | 0.2  | 0.0694                        | 0.0044                            |
| <i>mph1</i> Δ           | CAG-70        | 7           | 14                                       | 1.2  | 0.0244                        | 0.0040                            |
| <i>rad5</i> Δ           | CAG-70        | 3           | 9.8                                      | 3.4  | 0.8848                        | 0.0187                            |
| wild-type               | CTG-70        | 7           | 13                                       | 1.7  |                               |                                   |
| <i>srs2</i> Δ           | CTG-70        | 9           | 25                                       | 3.2  | 0.0070                        |                                   |
| <i>srs2</i> -(1-860)    | CTG-70        | 10          | 17                                       | 1.6  | 0.0614                        | 0.0397                            |
| <i>srs2</i> -(875-902Δ) | CTG-70        | 6           | 9.6                                      | 0.87 | 0.1899                        | 0.0021                            |
| <i>srs2</i> -K41R       | CTG-70        | 10          | 26                                       | 3.1  | 0.0032                        | 0.7418                            |
| <i>srs2</i> -(1-998)    | CTG-70        | 6           | 18                                       | 1.3  | 0.0249                        | 0.1293                            |

**Table S4. 2D Gel Analysis**

| Strain  | Origin              | Genotype                                                                                                         | Exp. # | Time point | Pause | Cone |
|---------|---------------------|------------------------------------------------------------------------------------------------------------------|--------|------------|-------|------|
| GFY117  | Kerrest et al. 2009 | <i>MATa ura3Δ851 leu2Δ1 his3Δ200 trp1Δ63 ade2-opal SUP4 arg2Δ::CTG98-TRP1</i>                                    | 1      | 60'        | 0.72  | 0.35 |
|         |                     |                                                                                                                  |        | 90'        | 1.27  | 0.41 |
|         |                     |                                                                                                                  | 2      | 60'        | 1.16  | 0.30 |
|         |                     |                                                                                                                  |        | 90'        | 1.10  | 0.78 |
|         |                     |                                                                                                                  | 3      | 30'        | 1.40  | 0.53 |
|         |                     |                                                                                                                  |        | 40'        | 1.62  | 0.37 |
|         |                     |                                                                                                                  |        | 60'        | 1.42  | 0.66 |
| CFY3910 | This work           | <i>MATa ura3Δ851 leu2Δ1 his3Δ200 trp1Δ63 ade2-opal SUP4 arg2Δ::CTG98-TRP1 srs2Δ::KANMX6</i>                      | 1      | 40'        | 0.73  | 0.39 |
|         |                     |                                                                                                                  |        | 60'        | 0.81  | 0.60 |
|         |                     |                                                                                                                  |        | 90'        | 1.20  | 0.90 |
| CFY2201 | This work           | <i>MATa ura3Δ851 leu2Δ1 his3Δ200 trp1Δ63 ade2-opal SUP4 arg2Δ::CTG98-TRP1 srs2-(1-860)-HYG</i>                   | 1      | 90'        | 0.91  | 0.68 |
|         |                     |                                                                                                                  | 2      | 50'        | 1.08  | 0.72 |
|         |                     |                                                                                                                  |        | 60'        | 1.06  | 0.49 |
|         |                     |                                                                                                                  |        | 90'        | 0.72  | 0.67 |
| CFY2301 | This work           | <i>MATa ura3Δ851 leu2Δ1 his3Δ200 trp1Δ63 ade2-opal SUP4 arg2Δ::CTG98-TRP1 srs2-(1-998)-HIS3</i>                  | 1      | 50'        | 0.78  | 0.75 |
|         |                     |                                                                                                                  |        | 60'        | 0.80  | 0.49 |
|         |                     |                                                                                                                  |        | 90'        | 0.77  | 0.66 |
|         |                     |                                                                                                                  | 2      | 40'        | 0.95  | 0.56 |
|         |                     |                                                                                                                  |        | 50'        | 1.13  | 0.55 |
|         |                     |                                                                                                                  |        | 60'        | 0.92  | 0.77 |
| GFY177  | This work           | <i>MATa ura3Δ851 leu2Δ1 his3Δ200 trp1Δ63 ade2-opal SUP4 arg2Δ::CTG98-TRP1 srs2-(875-902Δ)-HYG</i>                | 1      | 60'        | 0.49  | 0.48 |
|         |                     |                                                                                                                  | 2      | 40'        | 0.73  | 0.50 |
|         |                     |                                                                                                                  |        | 50'        | 0.89  | 0.43 |
|         |                     |                                                                                                                  |        | 60'        | 1.15  | 0.78 |
| GFY198  | This work           | <i>MATa ura3Δ851 leu2Δ1 his3Δ200 trp1Δ63 ade2-opal SUP4 arg2Δ::CTG98-TRP1 srs2-(875-902Δ)-HYG rad51Δ::KANMX6</i> | 1      | 60'        | 1.17  | 0.53 |

|         |           |                                                                                                             |   |     |      |      |
|---------|-----------|-------------------------------------------------------------------------------------------------------------|---|-----|------|------|
|         |           |                                                                                                             | 1 | 90' | 1.09 | 0.78 |
| CFY2303 | This work | <i>MATa ura3Δ851 leu2Δ1 his3Δ200 trp1Δ63 ade2-opal SUP4 arg2Δ::CTG98-TRP1 srs2-K41R-HIS3</i>                | 1 | 60' | 1.09 | 0.55 |
|         |           |                                                                                                             | 2 | 50' | 1.11 | 1.22 |
|         |           |                                                                                                             | 3 | 40' | 0.75 | 0.84 |
|         |           |                                                                                                             |   | 50' | 1.02 | 0.91 |
|         |           |                                                                                                             |   | 60' | 1.00 | 0.89 |
|         |           |                                                                                                             |   | 90' | 0.80 | 0.91 |
| GFY197  | This work | <i>MATa ura3Δ851 leu2Δ1 his3Δ200 trp1Δ63 ade2-opal SUP4 arg2Δ::CTG98-TRP1 srs2-K41R-HIS3 rad51Δ::KANMX6</i> | 1 | 60' | 0.62 | 0.45 |
|         |           |                                                                                                             | 2 | 50' | 1.07 | 0.24 |
|         |           |                                                                                                             | 3 | 50' | 1.20 | 0.68 |
|         |           |                                                                                                             | 3 | 60' | 1.04 | 0.68 |
|         |           |                                                                                                             | 3 | 90' | 0.61 | 0.67 |
| GFY195  | This work | <i>MATa ura3Δ851 leu2Δ1 his3Δ200 trp1Δ63 ade2-opal SUP4 arg2Δ::CTG98-TRP1 rad5Δ::KANMX6</i>                 | 1 | 60' | 0.91 | 0.79 |
|         |           |                                                                                                             | 2 | 50' | 1.22 | 1.33 |
|         |           |                                                                                                             | 2 | 60' | 1.06 | 1.16 |
|         |           |                                                                                                             | 2 | 90' | 1.04 | 1.03 |
|         |           |                                                                                                             | 3 | 60' | 0.87 | 0.65 |
| CFY3078 | This work | <i>MATa ura3Δ851 leu2Δ1 his3Δ200 trp1Δ63 ade2-opal SUP4 arg2Δ::CTG98-TRP1 exo1Δ::KANMX6</i>                 | 1 | 40' | 0.55 | 1.21 |
|         |           |                                                                                                             |   | 50' | 0.81 | 0.90 |
|         |           |                                                                                                             |   | 60' | 0.65 | 1.09 |
|         |           |                                                                                                             |   | 90' | 0.39 | 1.14 |
| GFY196  | This work | <i>MATa ura3Δ851 leu2Δ1 his3Δ200 trp1Δ63 ade2-opal SUP4 arg2Δ::CTG98-TRP1 mph1Δ::KANMX6</i>                 | 1 | 60' | 1.01 | 0.85 |
|         |           |                                                                                                             |   | 90' | 0.99 | 0.93 |
